# Supplementary material
Source: Springer Nature journal article supplement (https://www.springermedizin.de/resource/supplementary/12887_2012_622_MOESM1_ESM.pdf/9475466)
Supplement: MOESM1 [file 9475466]

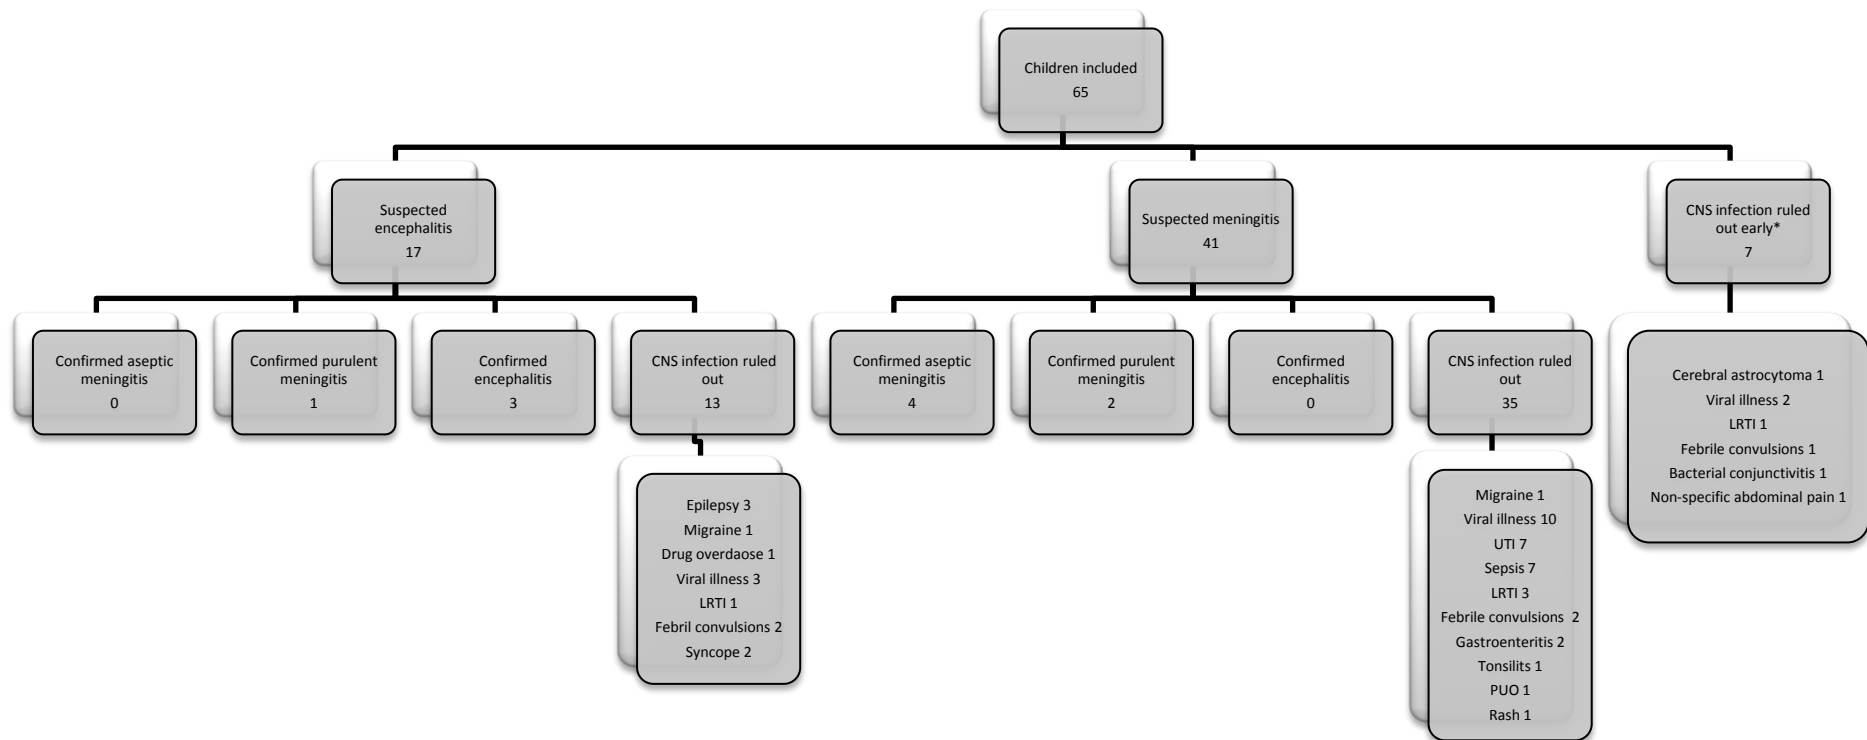

CNS = central nervous system, LRTI = lower respiratory tract infection, UTI = urinary tract infection, PUO = pyrexia of unknown origin

\*CNS infection suspected, CSF findings normal, no treatment given
